1 **Title Page**

2

3 **The use of a virus-derived targeting peptide to selectively kill staphylococcus bacteria with**  
4 **antimicrobial peptides**

5

6 Author names:

7 1. S M Ashiqul Islam<sup>1,\*</sup> (ORCID: 0000-0002-5686-6474) & Ankan Choudhury<sup>2,\*</sup>

8 2. Meron R. Ghidey<sup>1</sup>

9 3. Christopher Michel Kearney<sup>1,2,3</sup> (ORCID: 0000-0002-1945-7815)

10 <sup>1</sup>Institute of Biomedical Studies, Baylor University, One Bear Place #97264, Waco, Texas, 76798

11 <sup>2</sup>Department of Biology, Baylor University, One Bear Place #97264, Waco, Texas, 76798

12 <sup>3</sup>Corresponding author. Email address: [Chris\\_kearney@baylor.edu](mailto:Chris_kearney@baylor.edu); Phone: 2547102131

13 \*These authors contributed equally to the work.

14

15

16 **Abstract**

17 **Background**

18 Targeted therapies seek to selectively eliminate a pathogen without disrupting the microbiome  
19 community. Bacteriophages provide a rich, well-documented source of bacterium-specific binding  
20 proteins for use as targeting peptides fused to antimicrobial peptides. Though resistance may  
21 develop as with any antibiotic, the wealth of variants available in natural bacteriophage  
22 populations adds to the robustness of this system.

23

## 24 **Results**

25 Here, we target two cationic antimicrobial peptides (AMPs), plectasin and eurocin, by genetically  
26 fusing their coding sequence to that of the host-binding protein of bacteriophage A12C, which  
27 selectively infects *Staphylococcus*. Surprisingly, we noted that targeting brought no change in the  
28 toxicity of the AMP when applied to two different staphylococci, *S. aureus* and *S. epidermidis*, but  
29 found a drastic decrease in toxicity against the negative controls, *Enterococcus faecalis* and  
30 *Bacillus subtilis*. Thus, the differential selectivity in this case is a loss of toxicity against the non-  
31 target species rather than the gain of toxicity against the target species which was reported in  
32 previous studies with other types of targeting antimicrobial peptides.

## 33 **Conclusion**

34 This is the first report of the use of virus-derived peptide sequences to target antimicrobial peptides.  
35 Considering the very large databank of bacteriophages and their bacterial hosts, this targeting  
36 approach should be generally applicable to a wide range of bacterial pathogens.

37 Key words: **antimicrobial peptides, specifically targeted, staphylococcus, SUMO, virus-**  
38 **derived targeting domain.**

39

## 40 **Background**

41 Small molecule antibiotics are the standard treatment against bacterial infections, but they have  
42 three key deficits. First, antibiotics have long discovery and development cycles typical of small  
43 molecule drugs [1, 2]. Second, the broad-spectrum nature of antibiotics disrupts the gut microbiota  
44 and can lead to the rise of opportunistic pathogens [3, 4]. Finally, resistance against antibiotics is  
45 increasing as bacterial populations under selection pressure develop effective antibiotic-binding

46 proteins, efflux pumps and degradative enzymes [5]. Antimicrobial peptides (AMPs) are a well-  
47 studied antibiotic alternative that can address these deficits.

48         The first problem with antibiotics, that of the long discovery cycle, is addressed by the  
49 sheer ubiquity of AMPs in nature. AMPs are found across bacterial, animal and plant taxa and  
50 function against bacterial, viral and/or fungal targets [6]. Since their initial discovery in the late  
51 20<sup>th</sup> century [6], use of AMPs as alternatives to current antibiotics have been of great interest while  
52 the rise of drug resistance in bacteria was met with only a decrease in novel antibiotics discovery  
53 [2]. To accelerate access to these natural AMPs, our group has developed algorithms for  
54 discovering AMP ORFs from genomic data. First, we have developed an SVM-based algorithm  
55 model [7] to identify ORFs corresponding to the sequential tri-disulfide peptide (STP) structure  
56 that is typical of the compact, pH and temperature resilient and highly stable AMPs that belong to  
57 the larger knottin family [41]. Second, we have developed natural language processing-based  
58 algorithms for determining protein function [8], allowing for the screening of functional AMPs  
59 across many taxa. Once these sequences are discovered, they can be recombinantly expressed in  
60 bacterial [9, 10], fungal [11, 12] or plant [13, 14] bio-factories for function confirmation and mass  
61 production, greatly speeding up the process of drug development.

62         The second problem of antibiotics, that of the disruption of the greater microbiota by broad  
63 spectrum activity, can be resolved by peptide targeting. Targeting has gained ascendance in cancer  
64 therapy research and studies centered around directing drug activity, including RNAi, CRISPR  
65 Cas9 and gene therapy methodologies. Targeting can be accomplished using virus delivery or by  
66 attaching small peptide targeting moieties such as pheromones and antibody fragments (e.g., scFv)  
67 [15, 16]. There are a limited number of examples of targeting applied to AMPs. An antibody  
68 transgene coding for an scFv targeting domain fused to an AMP resulted in a transgenic plant

69 resistant to pathogenic fungi [15]. As a drug-based example on a commercial scale, targeting  
70 moieties based on pheromones conjugated with synthetic AMPs has provided specific inhibition  
71 of *Streptococcus mutans*, a dental carries agent [17, 42]. Quorum-sensing peptide conjugates like  
72 ArgD with plectasin (an AMP of fungal origin) were developed against methicillin resistant *S.*  
73 *aureus* [18]. It was intriguing to us that viral-guided targeting, with potentially universal  
74 application against bacteria and fungi, has not yet been used with AMPs [19].

75         The third problem of antibiotics, that of the development of pathogen strains resistant to  
76 the antibiotic, can also be potentially solved using AMPs. Resistance against AMPs is rare and is  
77 slow to develop in pathogens [20]. Cationic AMPs usually target the fundamental property of the  
78 negatively charged nature of the bacterial cell outer membrane, and combined with the  
79 hydrophobic regions of the AMP, which directly interact with the bacterial membrane [21, 22].  
80 Recombinant expression of AMPs is favorable to naturally purifying these peptides from their  
81 source organisms. Synthetic production of AMPs is a more precise method by the addition of  
82 single amino acids, but struggles with more complex peptides like STPs that require post-  
83 translational modifications including glycosylation and forming disulfide bonds [43]. This leaves  
84 the recombinant expression *E.coli* system for producing high yields...

85         In this study, we demonstrate a high level of production of the cationic AMPs plectasin  
86 [23] and eurocin [24] targeted by fusion to bacteriophage A12C coat protein display peptide with  
87 specificity for *Staphylococcus aureus* [25]. Both the AMPs are of fungal origin and active against  
88 a broad range of Gram positive bacteria [23, 24]. This is the first reported use of viral-based  
89 targeting domain to synthesize chimeric AMPs. The efficacy of the AMPs with the fusion partner  
90 were evaluated over the bactericidal efficacy of non-fusion AMPs against 4 strains of  
91 *Staphylococcus* and non-*Staphylococcus* bacteria. Interestingly, the targeting domain does not

92 enhance AMP toxicity towards the target bacterial species, but instead operates by drastically  
93 decreasing toxicity against non-target bacteria.

94

## 95 **Methods**

### 96 **Reagents**

97 *E. coli* (BL21 and 10β) strains were purchased from New England Biolabs. The pE-SUMOstar  
98 vector used for *E. coli* expression was purchased from LifeSensors. The Ulp1 protease was  
99 expressed in *E. coli* using pFGET19\_Ulp1 plasmid purchased from Addgene. The gBlock  
100 (gBlocks® Gene Fragments) containing *E. coli*-codon optimized sequences of plectasin, eurocin,  
101 and the A12C fusion peptide were purchased from IDT. Synthetic A12C was purchased from  
102 Biosynthesis. The strains of bacteria used for antimicrobial assay were obtained from S. J. Kim,  
103 Department of Chemistry and Biochemistry, Baylor University, and the Microbiology Laboratory,  
104 Department of Biology, Baylor University (See Table 1.)

105 **Table 1:** AMPs with and without viral targeting moiety from phage A12C.

106

| Peptide         | Sequence                                              | Molecular Weight (in Daltons) |
|-----------------|-------------------------------------------------------|-------------------------------|
| Plectasin       | GFGCNGPWDEDDMQCHNHCK<br>SIKGYKGGYCAKGGFVCKCY          | 4408                          |
| A12C- Plectasin | <u>GVHMOVAGPGREPTGGGHM</u> GF<br>GCNGPWDEDDMQCHNHCKSI | 6137                          |

|                                                        |                                                                                              |      |
|--------------------------------------------------------|----------------------------------------------------------------------------------------------|------|
|                                                        | KGYKGGYCAKGGFVCKCY                                                                           |      |
| Eurocin                                                | GFGCPGDAYQCSEHCRA<br>LGG<br><br>GRTGGYCAGPWYLGHPTCTCSF                                       | 4345 |
| A12C-Eurocin                                           | <u>GVH</u> MVAGPGREPTGGGHM<br>GF<br><br>GCPGDAYQCSEHCRA<br>LGGGR<br><br>TGGYCAGPWYLGHPTCTCSF | 6074 |
| * The underlined sequence is the A12C targeting domain |                                                                                              |      |

107

## 108 **Construction and Cloning of Plasmid**

109 After digestion, the synthesized genes (Integrated DNA Technologies) were cloned into the pE-  
110 SUMOstar vector following the SUMO protease cleavage site (Figure 1). The recombinant  
111 plasmids were electroporated into *E. coli* 10 $\beta$  cells and positively transformed colonies were  
112 selected with kanamycin and screened via PCR. The prepared plasmids were extracted and  
113 transformed into chemically competent BL21 cells for expression [27].

114

115

116

117

118

119

120 **Figure 1:**

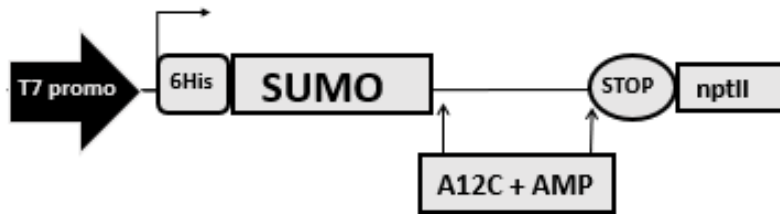

121

122

123 **Figure 1:** pE-SUMOstar/AMP *E. coli* vector. The SUMO protease cleavage site allowed the  
124 release of AMP (plectasin or eurocin) from the SUMO fusion partner. MCS, multiple cloning site  
125 (MCS).

126

127 **Expression, Extraction and Purification of Proteins**

128 Positive BL21 transformants were grown in 20 ml 2X YT broth (50 µg/mL kanamycin) at 37°C  
129 overnight with shaking. The primary culture was used to inoculate a secondary culture of 500 ml  
130 2X YT broth (50 µg/mL kanamycin). The secondary cultures were grown at 37°C with shaking  
131 (220 rpm) to an OD<sub>600</sub> of 0.7. This was followed by four hours of induction with 0.1 mM IPTG at  
132 180 rpm. The cells were harvested by centrifugation at 10,000 x g for 1 hour at 4°C. The bacterial  
133 pellets were resuspended with PBS buffer containing 25 mM imidazole and 0.1 mg/ml lysozyme  
134 and then frozen overnight to facilitate lysis of bacterial cell. The frozen suspensions were thawed  
135 and sonicated at 40% amplitude with a probe sonicator. The lysed and sonicated slurry was then  
136 ultracentrifuged at 80,000 x g for 1 hour at 4°C and the resultant supernatant was retained. The  
137 supernatant was then subjected to nickel column chromatography using PBS with 25 mM  
138 imidazole as the binding and wash buffer and PBS with 500 mM imidazole as the elution buffer.  
139 The eluents were screened for the presence of proteins by SDS-PAGE and the positive fractions  
140 were combined for storage at 4°C. Before using the proteins, the SUMO fusion partner was

141 removed using added Ulp1 protease (1U per 100  $\mu$ g of substrate) at 4°C overnight under mild  
142 nutation. The extent of cleavage was confirmed by SDS-PAGE. The gel bands corresponding to  
143 the AMPs were also excised and subjected to in-gel tryptic digestion (Thermo Fisher). After the  
144 digestion with trypsin, confirmation of the proteins' identity was performed by LC-ESI-MS  
145 (Synapt G2-S, Waters) at the Baylor University Mass Spectrometry Center using samples obtained  
146 by in-gel tryptic digestions of SDS-PAGE bands of the respective proteins. The analysis of the MS  
147 data was done by MassLynx (v4.1) The spectra of each protein, both non-targeted and targeted,  
148 were peak centered and MaxEnt3 processed and then matched against hypothetical peaks from  
149 peptides generated by simulated Trypsin digestion of the respective proteins (Supplementary  
150 Figure S1-S16).

151

## 152 **Hemolytic Activity Assay**

153 Targeted and non-targeted AMPs were assessed for hemolytic activity via exposure to washed  
154 human erythrocytes. Red blood cells (RBCs) were collected a healthy volunteer was collected in  
155 5 ml vacutainers. RBCs were isolated by gentle centrifugation (500 g for 5 min), washed with  
156 equal volume 150 mM NaCl twice and then with equal volume of 10 mM PBS (pH 7.4). The pellet  
157 was then diluted in equal volume of PBS and then diluted to a 1:50 dilution with the same PBS to  
158 have an approximate concentration of  $5 \times 10^8$  RBCs/ml. To initiate hemolysis, 190  $\mu$ l of the cells  
159 was added to 20  $\mu$ l of a 2-fold serially diluted peptide/ test reagent in PBS in a 96-well flat-bottom  
160 microtiter plate. Wells without peptide were used as negative controls, while wells containing 1%  
161 Triton X-100 were used as positive controls. The plate was incubated at 37°C for 1 h and  
162 centrifuged at 3,000 g for 10 min. An aliquot (120  $\mu$ l) of supernatant from each well was  
163 transferred to a new plate to read the absorbance at 540 nm using a microtiter plate reader. The



164 percentage of hemolysis was calculated by the following equation: (A541 of the peptide-treated  
165 sample - A540 of buffer-treated sample)/(A540 of Triton X-100-treated sample - A541 of buffer-  
166 treated sample) x 100% [36].

167

### 168 ***In Vitro* Bactericidal Activity Assay**

169 The Ulp-1 protease-cleaved proteins were tested for antimicrobial assays against four strains of  
170 bacteria: Staphylococcus aureus, Staphylococcus epidermidis, Enterococcus faecalis and Bacillus  
171 subtilis. These four strains were selected because they are gram positive and the AMPs plectasin  
172 and eurocin are specifically active against gram positive bacteria [23, 24]. The control used for the  
173 experiment was free fusion partner SUMO protein dissolved in PBS as the vehicle. Vancomycin  
174 was used as the positive control, which was experimentally determined to be active against these  
175 bacteria. The standard protocol for a microtiter plate assay with serial dilution was used [28].  
176 Briefly, the first well of the 12-well row in the 96 well microtiter plate contained 50 µl of the  
177 highest concentration of test protein/control solution with serial 2-fold dilutions leading to the last  
178 well having 2<sup>-11</sup>th of the concentration as the initial well. The serial dilution was done with PBS  
179 buffer and additional 30 µl of Tryptic-Soy Broth (TSB)/LB media was given to the wells before  
180 inoculating with 10 µl of the bacterial culture. For inoculation, the bacteria were grown in TSB/LB  
181 media overnight and then diluted in the same media to meet the McFarland 0.5 standard. After  
182 inoculation, the plates were grown at 37°C for 8 to 12 hours (depending on the strain). After the  
183 initial growth period, 10µl of resazurin solution (0.0015% w/v in DI water) was added. After  
184 adding resazurin, the plates were allowed to grow for 30 min to an hour before checking the  
185 progress. The results were reconfirmed by allowing the plates to grow further for a period of 12

186 hours and then checked for the change in coloration of the wells. Each test and control peptide  
187 were tested against each strain of bacteria for n>5 replicates.

188

### 189 ***In Vitro* cell kinetics study**

190 The protease-cleaved peptides were assayed to determine their dynamic action against the bacteria  
191 in a growing culture. The bacteria assayed were *B. subtilis*, *S. epidermidis*, *S. aureus* and *E. faecalis*  
192 grown at 37°C with shaking and diluted in LB or TSB medium to  $\sim 1 \times 10^8$  CFU/ml. Antimicrobial  
193 peptides were then added to 2 ml of this culture and the culture was returned to 37°C with shaking  
194 for continued growth or decline over 8 hours. For plectasin and eurocin, the concentration used  
195 was 3x the minimum inhibitory concentration determined by the *in vitro* bactericidal activity assay  
196 described above. Targeted versions of these peptides were run at the same concentrations as the  
197 corresponding untargeted versions. The concentration of vancomycin was the mean of the  
198 concentrations of plectasin and eurocin ( $\sim 7 \times \text{MIC}$  for both the bacterial species). To determine  
199 titers, samples of 10  $\mu\text{l}$  were taken from each tube at specific time intervals from 2 hour to 10-hour  
200 post. The samples were diluted in LB or TSB media (1500x, 22500x, 45000x or 90000x) and  
201 spread on Mueller-Hinton agar plates. After an overnight growth period, the number of colonies  
202 formed were recorded and titers calculated.

203

### 204 ***In Vitro* biofilm inhibition assay**

205 In addition to testing the efficacy of the AMPs against the planktonic bacterial cultures, they were  
206 also evaluated on how effectively they can inhibit the growth of biofilms of the 4 bacterial species  
207 in a microtiter plate [37, 38]. The assay was performed following the protocol established in

208 previous articles [37, 38]. Briefly, the bacterial culture grown overnight in TSB/LB media were  
209 diluted 1:100 and 100  $\mu$ l of the dilution were added to 100  $\mu$ l of serially diluted AMP/ antibiotic  
210 control solution in PBS and allowed to grow for 24-36 hours to form a visible biofilm. The  
211 supernatant cultures from the wells were carefully aspirated and the underlying films were washed  
212 gently with PBS, dried over air and fixed with methanol. On the evaporation of methanol, the  
213 plates were washed again with PBS, air-dried and 125  $\mu$ l of 0.1% crystal violet was added to the  
214 wells. Crystal Violet stains the cell wall of the bacteria in the biofilm. After 10-15 minutes, the  
215 plates were washed again, dried and treated with 100  $\mu$ l of 30% acetic acid to dissolve the attached  
216 crystal violet stain. The absorbance of the wells was quantified at 540 nm with 30% acetic acid  
217 solution as blank. The absorbance data was tabulated against the concentration of the  
218 AMPs/control reagent in each well with at least 3 or more replicates for each test. The absorbance  
219 reading of crystal violet indicates the quantity of the biofilm that had formed in that well.

220

221

## Results

### 222 Protein Expression and Purification

223 AMPs with or without the targeting domain and the SUMO fusion partner, at 4-6 kDa and ~17  
224 kDa respectively, were highly expressed, successfully cleaved and clearly visualized with SDS-  
225 PAGE (Figure 2). For further peptide identification, peptides were extracted from the SDS-PAGE  
226 gel bands, digested by trypsin and detected by mass spectrometry. Peptide identities were  
227 confirmed using the MassLynx (v4.1) application (Waters), which created hypothetical MS peaks  
228 by virtual trypsin digestion of the four protein sequences and matched them with the spectrum  
229 generated experimentally. The hypothetical peaks simulated from the four peptides overlapped  
230 satisfactorily with the MS peaks generated in the spectrometer and hence confirmed the presence

231 of the peptides in our samples. Supplementary Figure S1, S3, S5, S7, S9, S11, S13 and S15 show  
232 the peptide list generated by the simulated trypsin digestion and their hypothetical m/z values (in  
233 red) with the matched peaks appearing in black. Supplementary Figures S2, S6, S10 and S14 show  
234 the MaxEnt3 processed deconvoluted mass spectrum of each peptide while Supplementary Figure  
235 S4, S8, S12 and S16 show the mass corrected (green) and peak centered (red) mass spectra of each  
236 peptides. The average yields ( $n \geq 3$ ) of the proteins plectasin, A12C-plectasin, eurocin and A12C-  
237 eurocin are provided in Table 2. These were calculated from the SDS-PAGE data, using NIH  
238 ImageJ to measure band density and the marker lane bands for mass reference.

239

240 **Figure 2:**

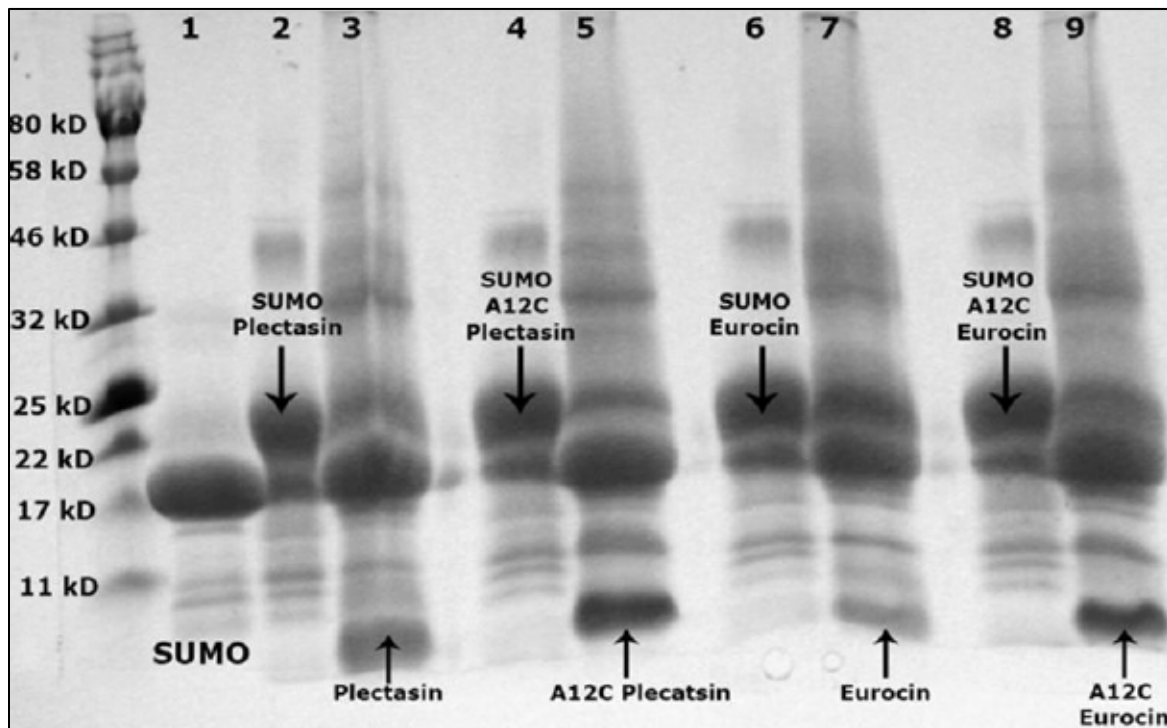

241

242 **Figure 2:** Expression of SUMO/AMP in *E. coli* and cleavage of AMP free of SUMO fusion  
243 partner. Plectasin (lane 2), A12C-plectasin (lane 4), eurocin (lane 6), A12C-eurocin (lane 8)

244 expressed with the SUMO fusion partner. On cleaving with SUMO protease (Ulp1), the cleaved  
245 SUMO protein can be seen at 17 kD on lanes 3, 5, 7 and 9; free SUMO protein control is in lane  
246 1. The released AMPs, with and without targeting moieties, are in the same lanes as with the  
247 cleaved SUMO below 11 kD.

248

249

250 **Table 2:** Mean Yield (n>=3) of targeted and non-targeted AMPs from E. coli/SUMO expression  
251 system.

| Peptide         | Milligram per liter of cell culture | Micromole per liter of cell culture |
|-----------------|-------------------------------------|-------------------------------------|
| Plectasin       | 15.7                                | 3.6                                 |
| A12C- Plectasin | 26.1                                | 4.2                                 |
| Eurocin         | 10.2                                | 2.4                                 |
| A12C-Eurocin    | 19.5                                | 3.2                                 |

252

### 253 **Hemolytic Activity Assay**

254 In concordance with previously published individual studies on A12C and both AMPs plectasin  
255 and eurocin [23-25], both targeted and untargeted fusion peptides displayed no hemolytic effect  
256 on human erythrocytes (data not shown) in comparison to a 20% Triton-X positive control.

257

258 ***In Vitro* Bactericidal Activity Assay**

259 Differential toxicity between targeted and non-targeted peptides was observed, with the addition  
260 of the viral A12 targeting domain driving a loss of activity against the non-target species rather  
261 than a gain of activity against the target species. A12C-AMPs retained their toxicity against both  
262 staphylococci bacterial species but showed a dramatic decrease in toxicity (presented  
263 logarithmically in Figure 3) against non-target species relative to natural AMPs (Figure 3). This  
264 data is presented in tabular format in Supplementary Table S1. Purified SUMO dissolved in PBS  
265 was used as a negative control for all experiments and showed no antimicrobial activity. For the  
266 non-target bacterium *E. faecalis* and *B. subtilis*, the attachment of the A12C targeting domain  
267 lowered the antimicrobial efficacy by increasing the mean MIC values for both plectasin and  
268 eurocin to over 70  $\mu\text{M}$  compared to  $<10 \mu\text{M}$  seen without the targeting moiety ( $p < 0.001$ ; ANOVA  
269 2-tailed test). For *S. aureus* and *S. epidermidis*, however, no significant rise in MIC values was  
270 observed upon attachment of the fusion partner for either eurocin or plectasin.

271

272

273

274

275

276

277

278

279

280

281 **Figure 3:**

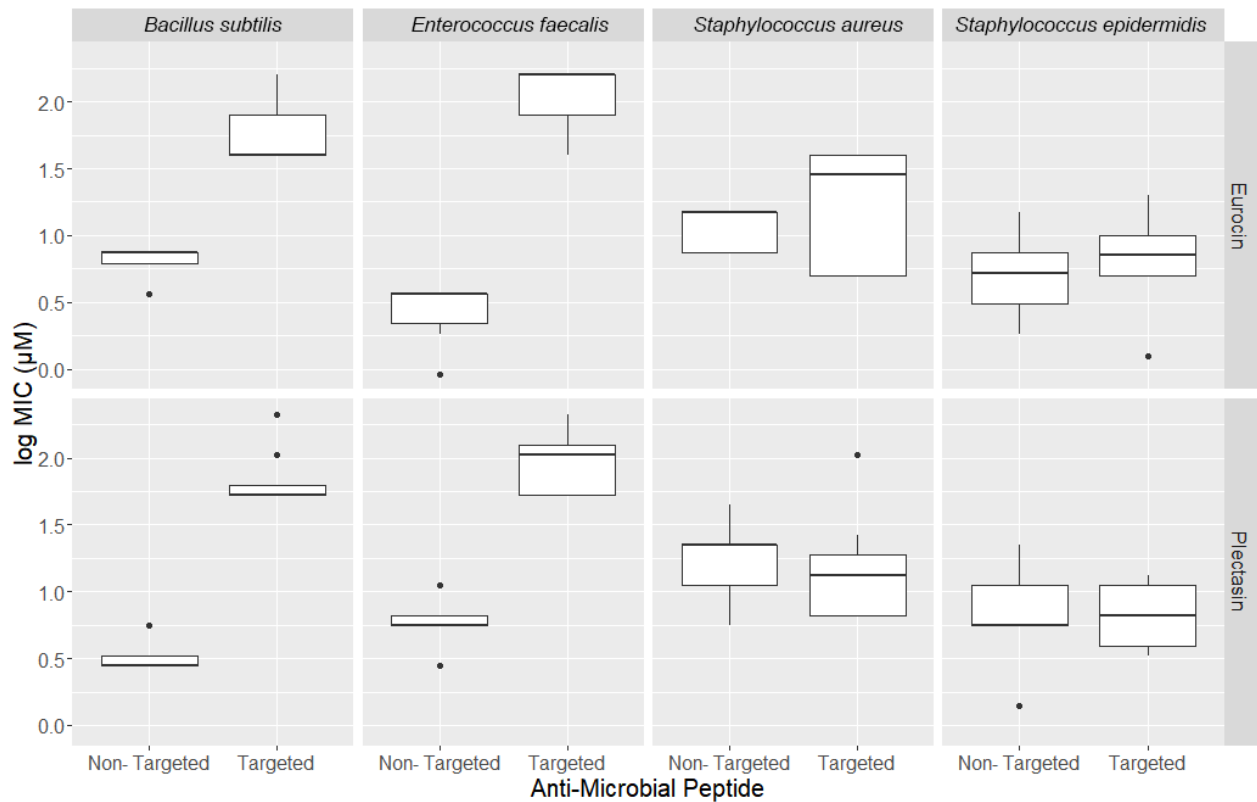

282

283 **Figure 3:** Log values for minimum inhibitory concentrations (MIC) in  $\mu\text{M}$  for non-targeted and  
284 targeted eurocin and plectasin against *Bacillus subtilis*, *Enterococcus faecalis*, *Staphylococcus*  
285 *aureus* and *Staphylococcus epidermidis*. The boxed regions represent 50% of the values while the  
286 bars represent 95%.

### 287 *In Vitro* cell kinetics study

288 Growth kinetics over an 8 to 10-hour period further demonstrated the loss of antimicrobial  
289 competence of the AMP against non-staph post targeting. All peptides - both targeted and non-  
290 targeted - demonstrated a strong bactericidal effect, as did the vancomycin positive control, against  
291 the target bacteria *S. epidermidis* and *S. aureus* over an 8-hour period (Figure 4a and 4b). In  
292 contrast, for the nontarget bacteria *B. subtilis* and *E. faecalis*, the bactericidal effect was seen only  
293 with nontargeted plectasin and eurocin peptides, with a toxicity similar to vancomycin. The A12C-

294 targeted analogues did not induce any decline in *B. subtilis* and *E. faecalis* cultures, which lagged  
295 only slightly behind the buffer-control treated cultures (Figure 4c and 4d). The relatively flatter  
296 growth curve for the *B. subtilis* control cultures reflects its growth kinetics, which is far slower  
297 than that of other bacteria.

298 **Figure 4:**

299

300

301

302 (a)

303

304

305

306

307

308

309

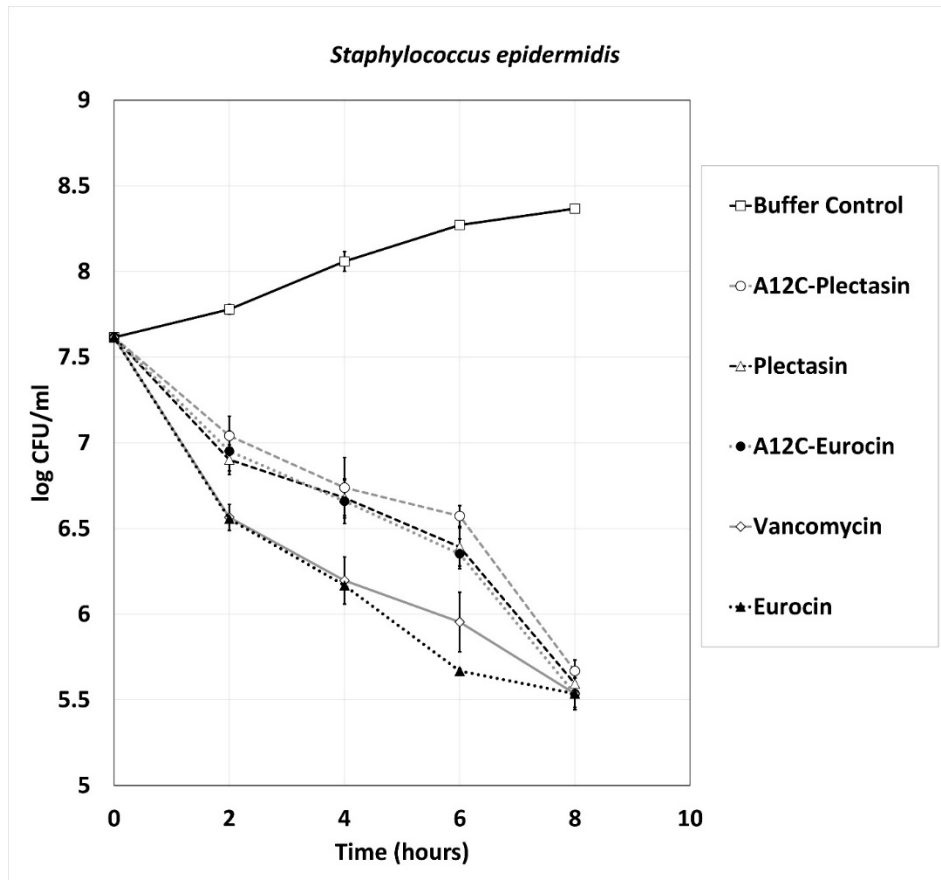



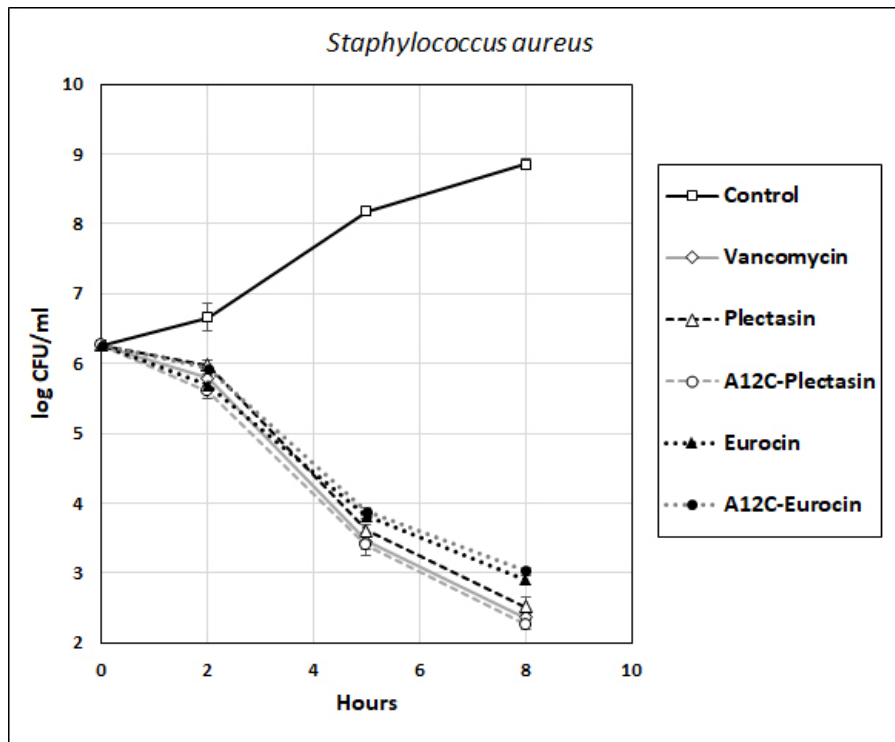

(b)

320

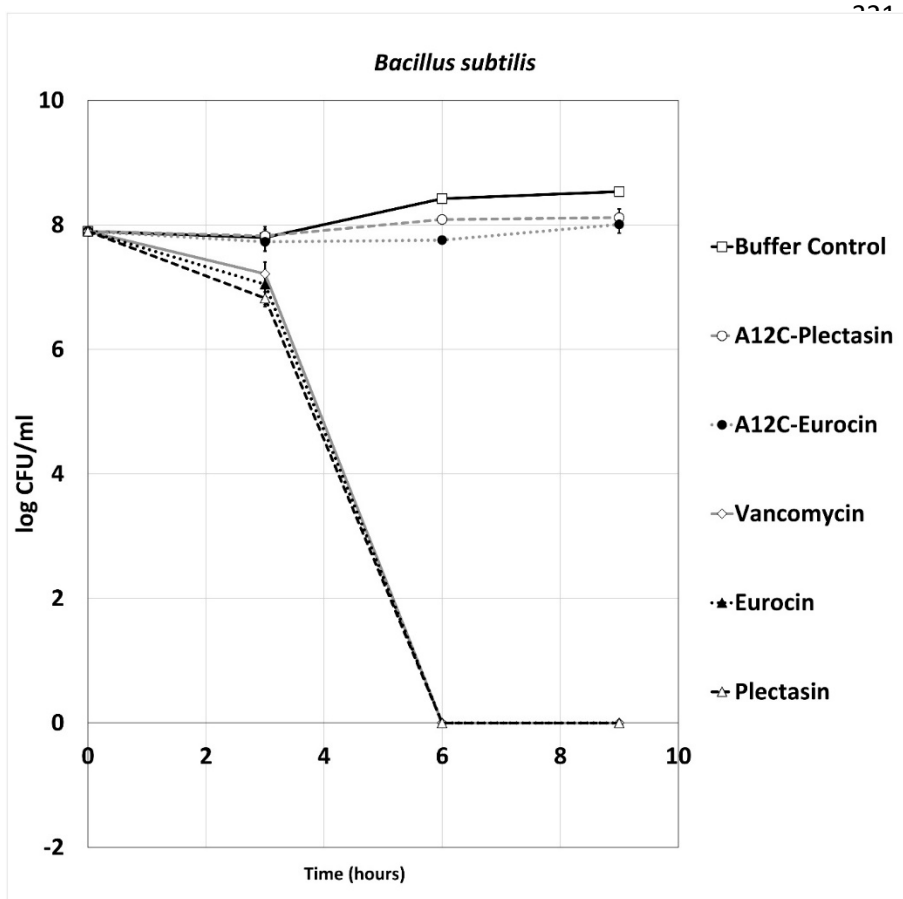

(c)

321

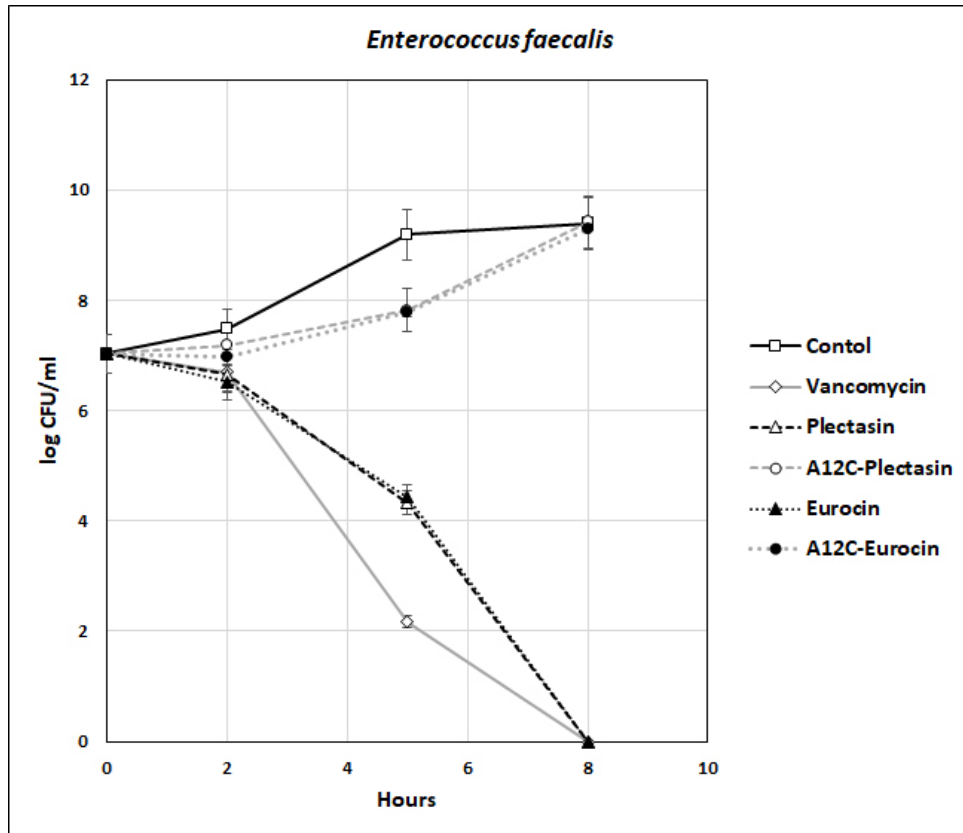

323

324

(d)

325 **Figure 4:** The cell-kinetic profile for *S. epidermidis* (a), *S. aureus* (b), *B. subtilis* (c) and *E. faecalis*  
326 (d) created by plotting log CFU/ml of the bacteria grown in the presence of each peptide for 8-10  
327 hours collected in 2-3 hour intervals.

328

### 329 *In Vitro* biofilm inhibition assay

330 Growing bacterial cultures with the peptides demonstrated the preferential inhibition of bacterial  
331 biofilm of the *Staphylococcus* strains (Figure 5 a and 5b) by the targeted AMPs over the non-  
332 *Staphylococcus* bacteria. The absorption reading (hence, the quantity of biofilm formed) decreased  
333 with the increase in peptide concentration for all the 4 bacteria when treated with non-targeted  
334 peptides but the targeted peptides did not have similar effects on *B. subtilis* (Figure 5c) and *E.*

335 *faecalis* (Figure 5d) with significant ( $p < 0.10$  or  $p < 0.05$ ) difference in the absorbance values  
336 between targeted and non-targeted AMPs at concentrations beyond  $6.25 \mu\text{M}$ .

337 **Figure 5:**

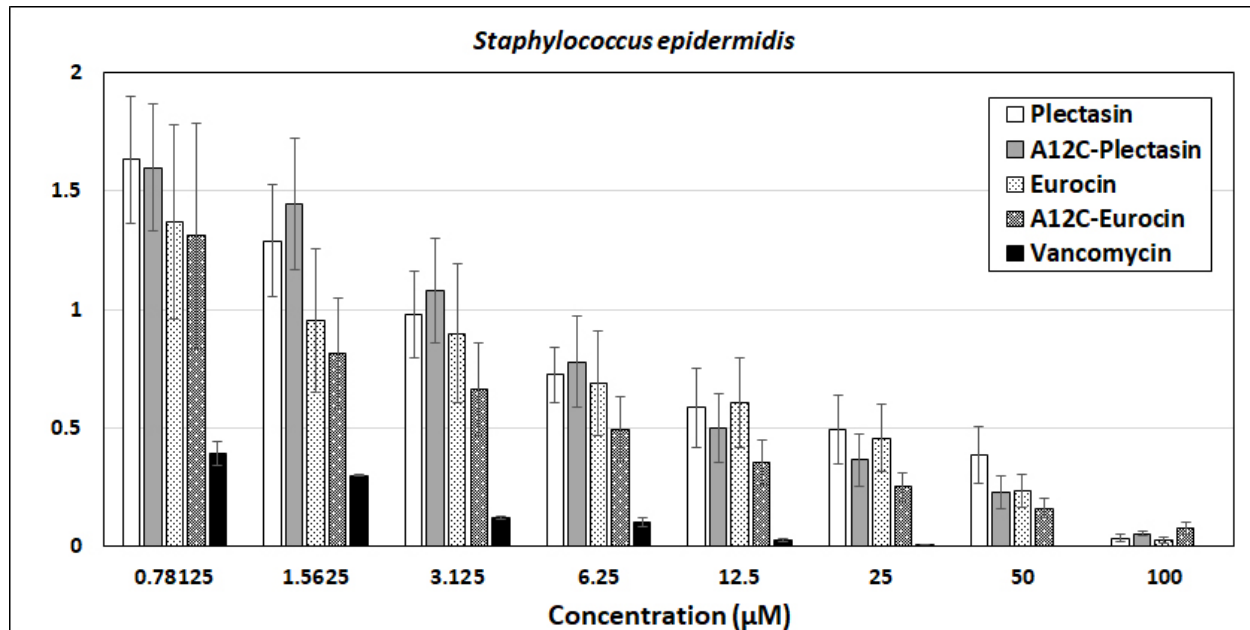

338

(a)

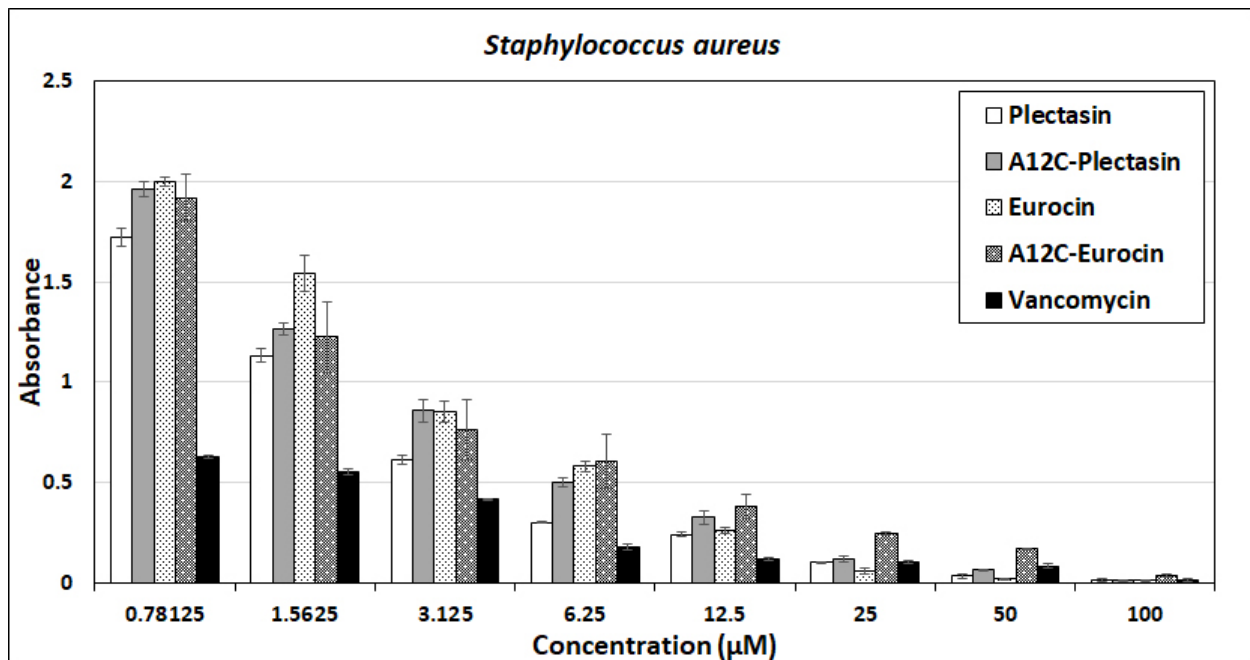

339

340

(b)

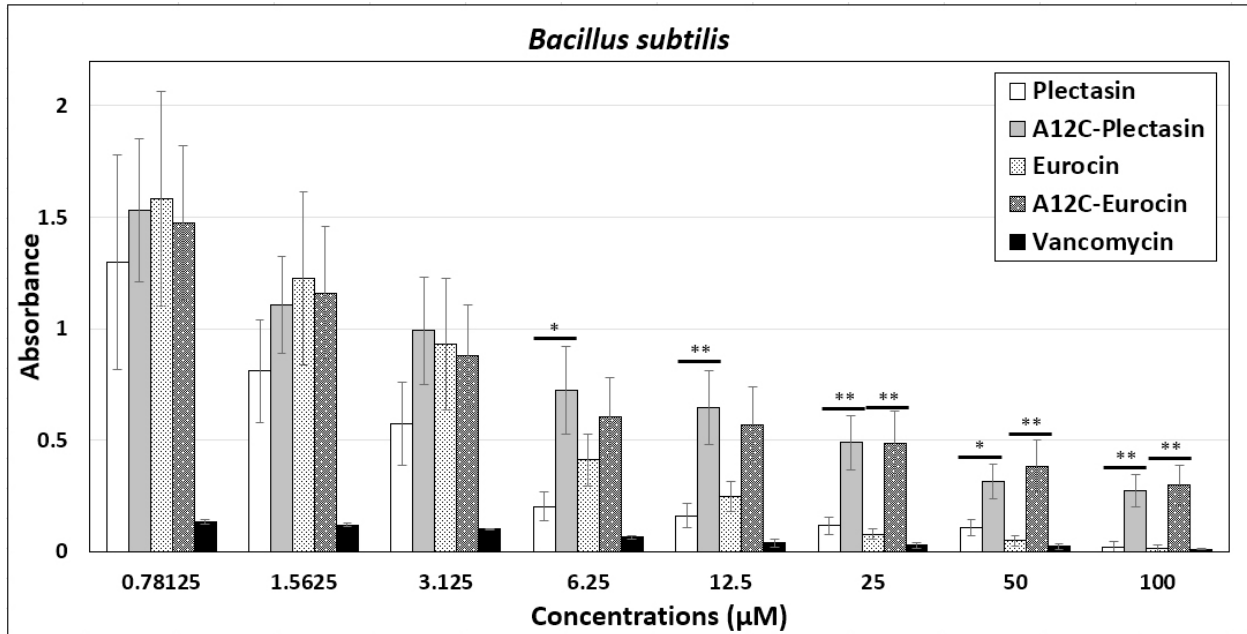

341

(c)

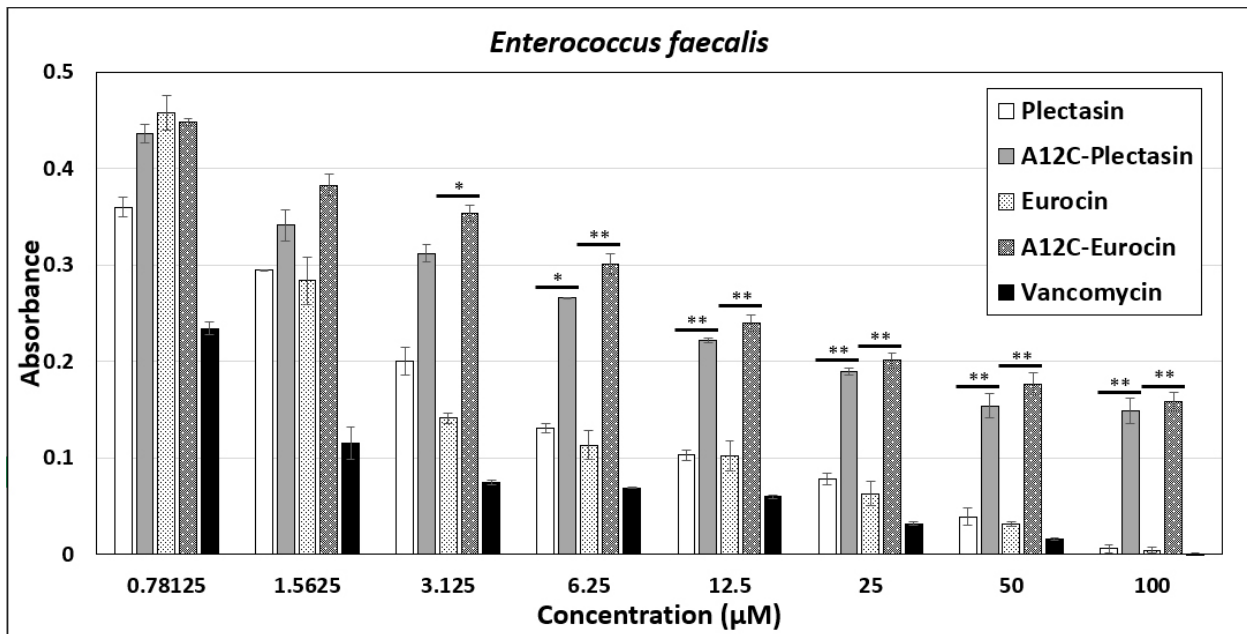

342

(d)

343 **Figure 5:** Biofilm inhibition activity evaluated by plotting the absorbance of crystal violet (540  
344 nm) against the concentration of 4 AMPs on the 4 bacteria - *S. epidermidis* (a), *S. aureus* (b), *B.*  
345 *subtilis* (c) and *E. faecalis* (d). (\* =  $p < 0.1$ , \*\* =  $p < 0.05$ ,  $n > 3$ )

346

347

## Discussion

348 With the rise of antibiotic-resistant bacterial infections, the discovery of new antimicrobial agents  
349 has become essential. AMPs are potentially less sensitive to develop resistance as they employ  
350 broadly targeted mechanism of toxicity. In addition, the advancement of sequencing technology  
351 and predictive algorithms [7, 29, 30] has expedited the discovery of new AMPs. This allows for  
352 data mining and the collection of large libraries of presumably well-adapted and functional native  
353 AMPs. However, as we have now gained an appreciation of the need to preserve native  
354 microbiomes, it is seen that a limitation of AMP applications in biotechnology is their broad range  
355 of antimicrobial activity without sufficient specificity.

356 Eliminating pathogenic organisms without affecting the commensal microorganisms is an  
357 important property for the next generation of antibiotics. Disturbing the microflora can lead to the  
358 rise of opportunistic pathogens and decreased health outcomes generally. In the pursuit to achieve  
359 specificity in their activity, several studies have already demonstrated the development of targeted  
360 antimicrobial action against *Streptococcus mutans* [17], *Enterococcus faecalis* [31], and  
361 *Staphylococcus aureus* [18]. In most cases, targeting moieties were derived from pheromone or  
362 quorum sensing peptides. However, an AMP fused to a targeting domain of bacteriophage origin  
363 has, to our knowledge, not been reported.

364 In this study we produced the specifically targeted AMPs, A12C-plectasin and A12C-  
365 eurocin, fused with a filamentous phage protein which has previously been shown to have a  
366 selective action against *Staphylococcus* bacteria [25]. We observed little to no toxicity against non-  
367 staphylococcal bacteria by the A12C-AMPs compared to the non-targeted parental AMPs, while  
368 non-targeted and targeted AMPs exhibited similar toxicity on both staphylococci (see Figure 3 and  
369 Supplementary Table S1). The result was a set of targeted AMPs with antimicrobial activity

370 specific to *Staphylococcus* while showing no significant antimicrobial action towards non-target  
371 bacterial species. This differential action between the targeted and non-targeted versions of the  
372 peptides was echoed in the *in vitro* anti-microbiocidal assay, cell kinetics assay and the biofilm  
373 inhibition assay. Hence, we can assume that the actions conferred to the AMPs by the fusion  
374 peptide A12C acts similarly with both planktonic form of the bacteria and static biofilms formed  
375 by them. Even though the article exploring A12C as a targeting domain for drug-carrying scaffold  
376 [25] demonstrated its affinity towards only *S. aureus*, in our study that phenomenon is also  
377 exhibited against *S. epidermidis*. In that study, however, this affinity was seen when contrasted  
378 against *E. coli*, a Gram-negative bacillus which is morphologically and biochemically quite  
379 distinct to *S. aureus*, especially in the biochemical make-up of their cell walls and membrane. The  
380 overlap we have observed in the action of our targeted AMPs against *S. aureus* and *S. epidermidis*  
381 may be attributed to the genus-specific characteristics shared by them but not by either *B. subtilis*  
382 or *E. faecalis*.

383         It is challenging to express high quantities of soluble, correctly folded and biologically  
384 active AMPs in *E. coli* [32]. Nevertheless, we were able to harvest AMPs at relatively high  
385 concentrations (see supplementary TableS1) using the SUMO fusion partner. We used the SUMO  
386 expression system and obtained a high concentration of the target proteins which also displayed  
387 the expected activity following the protease cleavage and separation from their SUMO fusion  
388 partner. An equal concentration of SUMO alone lacked toxicity, demonstrating that the toxicity  
389 was the property of the AMP and not the fusion partner.

390

391  
392  
393  
394  
395  
396  
397  
398  
399  
400  
401  
402  
403  
404  
405  
406  
407  
408  
409  
410  
411  
412

## Conclusions

Continued investigation of targeting moieties for targeted AMPs is necessary to keep pace with the constantly increasing number of antibiotic-resistant bacterial infections. As an advancement, we have demonstrated a targeted AMP using the combination of a phage display protein and an AMP for the first time. This study not only demonstrated the viability of using a viral protein as a targeting moiety, but also showed the toxicity of the AMP towards the target pathogen was equal to that of its non-targeted counterpart. Most pathogenic bacteria are vulnerable to a specific phage with many variants, as the phage and host bacterium evolve around each other. These phages constitute, therefore, an abundant and widely applicable source of targeting peptides [33–35] directing AMPs against specific bacterial pathogens, and, as well, a bank of variants that can be used to maintain the efficacy of the targeted antimicrobial peptides. Both *S. epidermidis* and *S. aureus* are fast emerging to be the dominant pathogens in nosocomial infection [39,40] due to their tendency of rapid biofilm formation and development of multi-drug resistance capabilities. Thus, the strategy explored by this study may help us in developing therapies to combat such infections without damaging the prevalent microflora in the subjects while also not contributing to the growing arsenal antimicrobial resistance in pathogens by avoiding the usage of conventional antibiotic.

413 **References**

414

415 1. Charles PGP, Grayson ML. The dearth of new antibiotic development: why we should be  
416 worried and what we can do about it. *Med J Aust.* 2004;181:549–53.

417 2. Norrby SR, Nord CE, Finch R. Lack of development of new antimicrobial drugs: a potential  
418 serious threat to public health. *The Lancet Infectious Diseases.* 2005;5:115–9.

419 3. Enright MC, Robinson DA, Randle G, Feil EJ, Grundmann H, Spratt BG. The evolutionary  
420 history of methicillin-resistant *Staphylococcus aureus* (MRSA). *Proc Natl Acad Sci USA.*  
421 2002;99:7687–92.

422 4. Thung I, Aramin H, Vavinskaya V, Gupta S, Park JY, Crowe SE, et al. Review article: the global  
423 emergence of *Helicobacter pylori* antibiotic resistance. *Alimentary Pharmacology & Therapeutics.*  
424 2016;43:514–33.

425 5. Soto SM. Role of efflux pumps in the antibiotic resistance of bacteria embedded in a biofilm.  
426 *Virulence.* 2013;4:223–9.

427 6. Hancock REW, Sahl H-G. Antimicrobial and host-defense peptides as new anti-infective  
428 therapeutic strategies. *Nat Biotechnol.* 2006;24:1551–7.

429 7. Islam SMA, Sajed T, Kearney CM, Baker EJ. PredSTP: a highly accurate SVM based model to  
430 predict sequential cystine stabilized peptides. *BMC Bioinformatics.* 2015;16. doi:10.1186/s12859-  
431 015-0633-x.



- 432 8. Islam SMA, Heil BJ, Kearney CM, Baker EJ. Protein classification using modified n-grams and  
433 skip-grams. *Bioinformatics*. 2017. doi:10.1093/bioinformatics/btx823.
- 434 9. Li Y. Recombinant production of antimicrobial peptides in *Escherichia coli*: A review. *Protein*  
435 *Expression and Purification*. 2011;80:260–7.
- 436 10. Li C, Blencke H-M, Paulsen V, Haug T, Stensvåg K. Powerful workhorses for antimicrobial  
437 peptide expression and characterization. *Bioengineered Bugs*. 2010;1:217–20.
- 438 11. de Bruin EC, Duitman EH, de Boer AL, Veenhuis M, Bos IGA, Hack CE. Pharmaceutical  
439 Proteins From Methylotrophic Yeasts. In: *Therapeutic Proteins*. New Jersey: Humana Press; 2005.  
440 p. 065–76. doi:10.1385/1-59259-922-2:065.
- 441 12. Cregg JM, Tolstorukov I, Kusari A, Sunga J, Madden K, Chappell T. Chapter 13 Expression  
442 in the Yeast *Pichia pastoris*. In: *Methods in Enzymology*. Elsevier; 2009. p. 169–89.  
443 doi:10.1016/S0076-6879(09)63013-5.
- 444 13. Huafang Lai QC, Jake Stahnke JH. Agroinfiltration as an Effective and Scalable Strategy of  
445 Gene Delivery for Production of Pharmaceutical Proteins. *Advanced Techniques in Biology &*  
446 *Medicine*. 2013;01. doi:10.4172/atbm.1000103.
- 447 14. Nadal A, Montero M, Company N, Badosa E, Messeguer J, Montesinos L, et al. Constitutive  
448 expression of transgenes encoding derivatives of the synthetic antimicrobial peptide BP100:  
449 impact on rice host plant fitness. *BMC Plant Biology*. 2012;12:159.

- 450 15. Peschen D, Li H-P, Fischer R, Kreuzaler F, Liao Y-C. Fusion proteins comprising a *Fusarium*-  
451 specific antibody linked to antifungal peptides protect plants against a fungal pathogen. *Nature*  
452 *Biotechnology*. 2004;22:732–8.
- 453 16. Wang B, Chen Y-B, Ayalon O, Bender J, Garen A. Human single-chain Fv immunoconjugates  
454 targeted to a melanoma-associated chondroitin sulfate proteoglycan mediate specific lysis of  
455 human melanoma cells by natural killer cells and complement. *Proceedings of the National*  
456 *Academy of Sciences*. 1999;96:1627–32.
- 457 17. Eckert R, He J, Yarbrough DK, Qi F, Anderson MH, Shi W. Targeted Killing of *Streptococcus*  
458 *mutans* by a Pheromone-Guided “Smart” Antimicrobial Peptide. *Antimicrobial Agents and*  
459 *Chemotherapy*. 2006;50:3651–7.
- 460 18. Mao R, Teng D, Wang X, Xi D, Zhang Y, Hu X, et al. Design, expression, and characterization  
461 of a novel targeted plectasin against methicillin-resistant *Staphylococcus aureus*. *Applied*  
462 *Microbiology and Biotechnology*. 2013;97:3991–4002.
- 463 19. Parachin NS, Mulder KC, Viana AAB, Dias SC, Franco OL. Expression systems for  
464 heterologous production of antimicrobial peptides. *Peptides*. 2012;38:446–56.
- 465 20. Maróti G, Kereszt A, Kondorosi É, Mergaert P. Natural roles of antimicrobial peptides in  
466 microbes, plants and animals. *Research in Microbiology*. 2011;162:363–74.
- 467 21. Nguyen LT, Haney EF, Vogel HJ. The expanding scope of antimicrobial peptide structures  
468 and their modes of action. *Trends in Biotechnology*. 2011;29:464–72.

- 469 22. Wang G, Mishra B, Lau K, Lushnikova T, Golla R, Wang X. Antimicrobial Peptides in 2014.  
470 Pharmaceuticals. 2015;8:123–50.
- 471 23. Mygind PH, Fischer RL, Schnorr KM, Hansen MT, Sönksen CP, Ludvigsen S, et al. Plectasin  
472 is a peptide antibiotic with therapeutic potential from a saprophytic fungus. Nature. 2005;437:975–  
473 80.
- 474 24. Oeemig JS, Lynggaard C, Knudsen DH, Hansen FT, Nørgaard KD, Schneider T, et al. Eurocin,  
475 a new fungal defensin: structure, lipid binding, and its mode of action. J Biol Chem.  
476 2012;287:42361–72.
- 477 25. Yacoby I, Shamis M, Bar H, Shabat D, Benhar I. Targeting Antibacterial Agents by Using  
478 Drug-Carrying Filamentous Bacteriophages. Antimicrobial Agents and Chemotherapy.  
479 2006;50:2087–97.
- 480 26. Li JF, Zhang J, Song R, Zhang JX, Shen Y, Zhang SQ. Production of a cytotoxic cationic  
481 antibacterial peptide in Escherichia coli using SUMO fusion partner. Applied Microbiology and  
482 Biotechnology. 2009;84:383–8.
- 483 27. Pope B, Kent HM. High Efficiency 5 Min Transformation of Escherichia Coli. Nucleic Acids  
484 Research. 1996;24:536–7.
- 485 28. Sarker SD, Nahar L, Kumarasamy Y. Microtitre plate-based antibacterial assay incorporating  
486 resazurin as an indicator of cell growth, and its application in the in vitro antibacterial screening  
487 of phytochemicals. Methods. 2007;42:321–4.

- 488 29. Islam SMA, Kearney CM, Baker EJ. CSPred: A machine-learning-based compound model to  
489 identify the functional activities of biologically-stable toxins. *IEEE*; 2017. p. 2254–5.  
490 doi:10.1109/BIBM.2017.8218014.
- 491 30. Xiao X, Wang P, Lin W-Z, Jia J-H, Chou K-C. iAMP-2L: a two-level multi-label classifier for  
492 identifying antimicrobial peptides and their functional types. *Anal Biochem*. 2013;436:168–77.
- 493 31. Qiu X-Q, Zhang J, Wang H, Wu GY. A Novel Engineered Peptide, a Narrow-Spectrum  
494 Antibiotic, is Effective against Vancomycin-Resistant *Enterococcus faecalis*. *Antimicrobial*  
495 *Agents and Chemotherapy*. 2005;49:1184–9.
- 496 32. Ingham AB, Moore RJ. Recombinant production of antimicrobial peptides in heterologous  
497 microbial systems. *Biotechnology and Applied Biochemistry*. 2007;47:1.
- 498 33. Elbreki M, Ross RP, Hill C, O’Mahony J, McAuliffe O, Coffey A. Bacteriophages and Their  
499 Derivatives as Biotherapeutic Agents in Disease Prevention and Treatment. *Journal of Viruses*.  
500 2014;2014:1–20.
- 501 34. Matsuzaki S, Rashel M, Uchiyama J, Sakurai S, Ujihara T, Kuroda M, et al. Bacteriophage  
502 therapy: a revitalized therapy against bacterial infectious diseases. *J Infect Chemother*.  
503 2005;11:211–9.
- 504 35. Viertel TM, Ritter K, Horz H-P. Viruses versus bacteria-novel approaches to phage therapy as  
505 a tool against multidrug-resistant pathogens. *J Antimicrob Chemother*. 2014;69:2326–36.

- 506 36. Evans BC, Nelson CE, Yu SS, Beavers KR, Kim AJ, Li H, et al. Ex Vivo Red Blood Cell  
507 Hemolysis Assay for the Evaluation of pH-responsive Endosomolytic Agents for Cytosolic  
508 Delivery of Biomacromolecular Drugs. *J Vis Exp*. 2013. doi:10.3791/50166.
- 509 37. Merritt JH, Kadouri DE, O'Toole GA. Growing and Analyzing Static Biofilms. *Curr Protoc*  
510 *Microbiol*. 2005;0 1:Unit-1B.1.
- 511 38. O'Toole GA. Microtiter Dish Biofilm Formation Assay. *J Vis Exp*. 2011. doi:10.3791/2437.
- 512 39. Chessa D, Ganau G, Spiga L, Bulla A, Mazzarello V, Campus GV, et al. *Staphylococcus aureus*  
513 and *Staphylococcus epidermidis* Virulence Strains as Causative Agents of Persistent Infections in  
514 Breast Implants. *PLoS One*. 2016;11. doi:10.1371/journal.pone.0146668.
- 515 40. Ziebuhr W. *Staphylococcus aureus* and *Staphylococcus epidermidis*: Emerging Pathogens in  
516 Nosocomial Infections. *Emerging Bacterial Pathogens*. 2001;8:102–7.
- 517 41. He W-J, Chan LY, Clark RJ, Tang J, Zeng G-Z, Franco OL, et al. Novel Inhibitor Cystine Knot  
518 Peptides from *Momordica charantia*. *PLoS One*. 2013;8. doi:10.1371/journal.pone.0075334.
- 519 42. Mai J, Tian X-L, Gallant JW, Merkley N, Biswas Z, Syvitski R, et al. A Novel Target-Specific,  
520 Salt-Resistant Antimicrobial Peptide against the Cariogenic Pathogen *Streptococcus mutans*.  
521 *Antimicrobial Agents and Chemotherapy*. 2011;55:5205–13.
- 522 43. Chalker JM, Bernardes GJL, Lin YA, Davis BG. Chemical Modification of Proteins at  
523 Cysteine: Opportunities in Chemistry and Biology. *Chemistry - An Asian Journal*. 2009;4:630–  
524 40.
- 525
- 526

527

528

529

530 **Declarations**

531

532 **Ethics approval and consent to participate:**

533 Not applicable

534

535 **Consent for publication**

536 Not applicable

537

538 **Availability of data and materials**

539 Not applicable

540

541 **Competing interests**

542 The authors declare that they have no competing interests.

543

544 **Funding**

545 This work was funded by a University Research Committee (URC) grant provided by Baylor  
546 University. The design, implementation and data interpretation are solely the product of the  
547 authors.

548

549

550

551

552

553 **Authors' contributions**

554 All authors contributed to the design of the project. SI, AC and MG built the genetic constructs  
555 and performed the protein purification and analysis. AC and MG did the microbial inhibition  
556 determinations. SI, AC, MG and CK wrote the manuscript. All authors read and approved the final  
557 manuscript. CK supervised each stage of the experiment.

558

559 **Acknowledgements**

560 Matthew Cranford from the Trakselis Laboratory at Baylor assisted with protein purification and  
561 the Baylor Mass Spectrometry Center provided support for our mass spectrometry analysis.

562

563

564

565

566

567

568
